# Supplementary material for: Photo-controlled metal-ion (Zn2+ and Cd2+) release in aqueous Tween-20 micelle solution
Source: Royal Society of Chemistry journal article supplement (doi:10.1039/c2cp23265k), 2012-01-01
Supplement: c2cp23265k.pdf [file c2cp23265k.pdf]

Electronic Supplementary Information

**Photo-controlled metal-ion ( $\text{Zn}^{2+}$  and  $\text{Cd}^{2+}$ ) release in aqueous  
Tween-20 micelle solution**

Xu Zhang and Yi Chen\*

*Key Laboratory of Photochemical Conversion and Optoelectronic Materials,  
Technical Institute of Physics and Chemistry, The Chinese Academy of Sciences,  
Beijing, 100190, China. Fax: 86 10 6487 9375; Tel: 86 10 8254 3595; E-mail:  
yichencas@yahoo.com.cn*

Contents

1. Absorption and fluorescence spectral of sample **3** in aqueous Tween-20 micelle solution. (Fig. 1)
2. Absorption spectral changes of complex **2** in aqueous Tween-20 micelle solution upon irradiation with 365 nm light. (Fig. 2)
3. Fluorescence spectral changes of **2** in aqueous Tween-20 micelle solution upon irradiation with 365 nm light. (Fig. 3)
4. The plot of fluorescence intensity vs irradiation time for  $\text{Cd}^{2+}$ -release. (Fig. 4)
5. Titration of ligand with  $\text{Cd}^{2+}$  in DMSO. (Fig. 5)
6. Absorption spectral of sample **3** in aqueous Tween-20 micelle solution with and without addition of  $\text{Cd}^{2+}$  (Fig. 6).
7. Absorption spectral of **3** in DMSO with and without addition of  $\text{Cd}^{2+}$ . (Fig. 7)

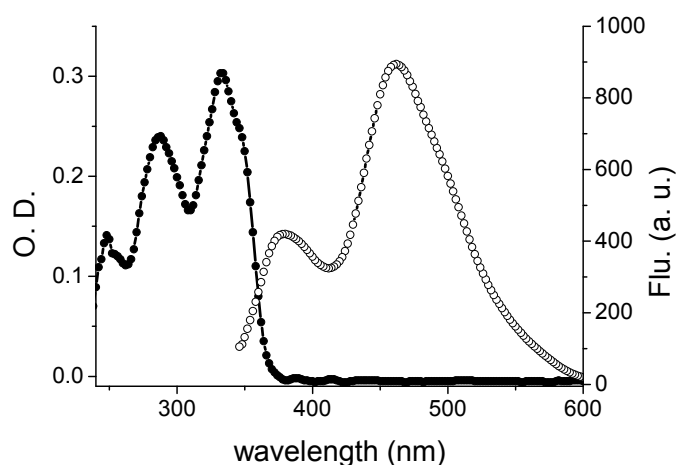

Fig. 1. Absorption (black) and fluorescence (white) of sample **3** (20  $\mu\text{M}$ ) aqueous Tween-20 micelle solution (tris-HCl, 50 mM, pH = 7.4,  $\text{KNO}_3 = 0.1\text{M}$ ) ( $\lambda_{\text{ex}} = 328$  nm).

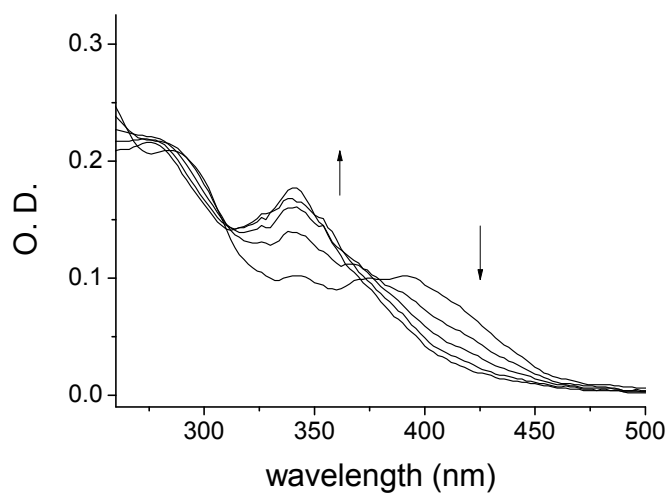

Fig. 2. Absorption changes of **2** (20  $\mu\text{M}$ ) in aqueous Tween-20 micelle solution (tris-HCl, pH = 7.4,  $\text{KNO}_3 = 0.1\text{M}$ ) upon 365 nm light irradiation (periods: 0, 4, 8, 12, 16 min).

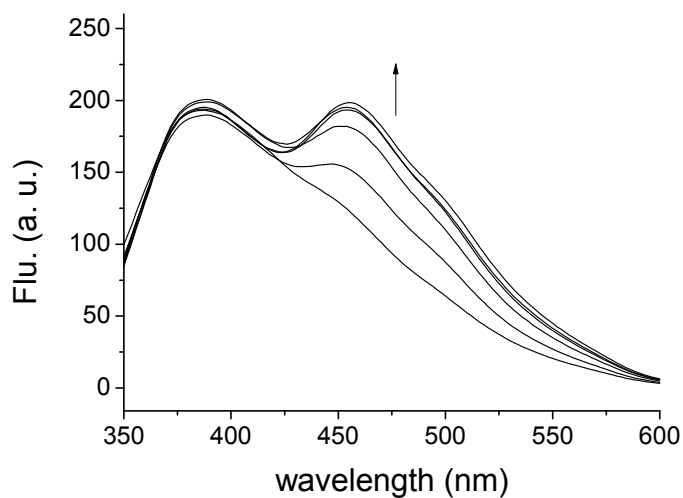

Fig. 3. Fluorescence changes of complex **2** in aqueous Tween-20 micelle solution (tris-HCl, pH = 7.4, KNO<sub>3</sub> = 0.1M) upon 365 nm light irradiation ( $\lambda_{\text{ex}} = 328$  nm, periods: 0, 4, 8, 12, 16 min).

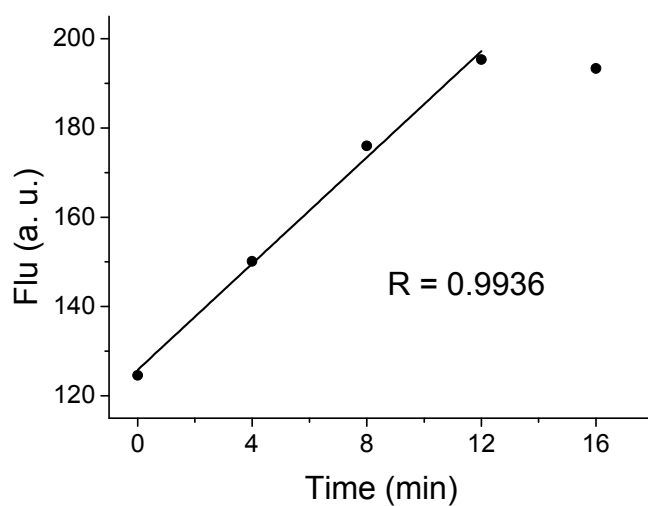

Fig. 4. The kinetics of Cd<sup>2+</sup>-release with different irradiation times (monitoring fluorescence intensity of **3** at 454 nm)

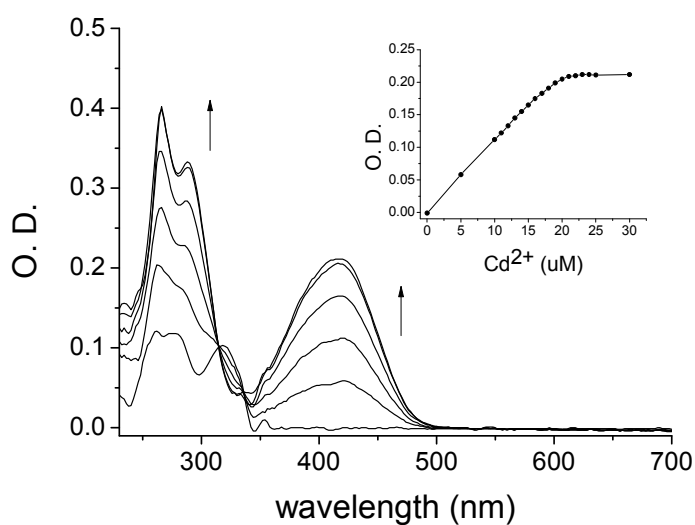

Fig. 5. Titration of 20  $\mu\text{M}$  of ligand with  $\text{Cd}^{2+}$  in DMSO. The inset is the plot of the optical density of complex **2** at 418 nm against the amount of  $\text{Cd}^{2+}$ .

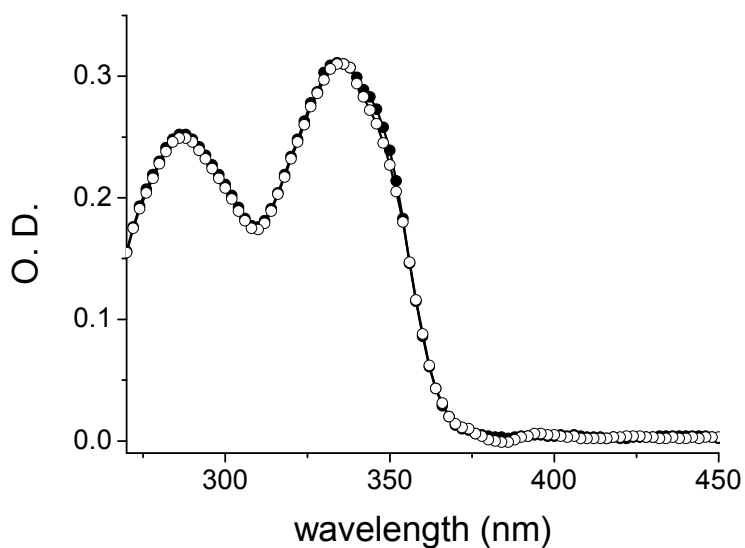

Fig. 6. Absorption spectral of sample **3** (20  $\mu\text{M}$ ) in aqueous Tween -20 micelle solution (tris-HCl, pH = 7.4,  $\text{KNO}_3 = 0.1\text{M}$ ) with (white) and without (black) addition of  $\text{Cd}^{2+}$  (20  $\mu\text{M}$ ).

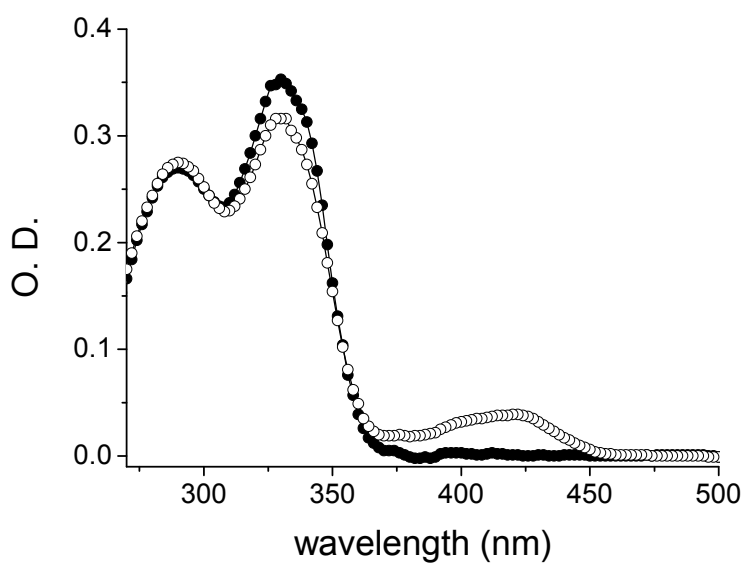

Fig. 7. Absorption spectral of **3** (20  $\mu\text{M}$ ) in DMSO with (white) and without (black) addition of  $\text{Cd}^{2+}$  (20  $\mu\text{M}$ ).
